# Supplementary material
Source: publisher figshare collection journal article supplement (https://geolsoc.figshare.com/ndownloader/files/28516868)
Supplement: Supplementary file 1 [file 28516868]

## Sheet: 0. Directory
Sheet(s)	Content
0	Directory
1	Summary of studies used in analysis
2	Scenario curves (Fig. 1)
3	Bravo Dome dissolution (Table 1)
4	Average dissolution rates (Figs. 3-5 and Table 2)
5	Dissolution rate time series (Fig. 6)
6-11	Extracted dissolution rate data from individual modelling studies

## Sheet: 1. Studies
Study	Reference	DOI	Study approach	Location and setting	Scenario used	Approx model dimensions (km)	Model porosity	Model permeability (mD)	Total duration (yr)
Ozah et al 2005	Ozah, R. C., Lakshminarasimhan, S., Pope, G. A., Sepehrnoori, K., and Bryant, S. L. 2005. Numerical Simulation of the Storage of Pure CO2 and CO2-H2S Gas Mixtures in Deep Saline Aquifers. Paper SPE 97255, presented at the SPE Annual Technical Conference and Exhibition, 9-12 October 2005, Dallas, USA	https://doi.org/10.2118/97255-MS	3D simulation - GEM	Generic Gulf Coast saline aquifer, USA	Base case	L: 16.2 W:16.2 H:0.305	0.16 - 0.34	5 - 1660	10000
Pickup et al 2011	Pickup, G. E., Jin, M., Olden, P., Mackay, E. J. and Sohrabi, M. 2011. A Sensitivity Study on CO2 Storage in Saline Aquifers. Paper SPE 143054, presented at the SPE EUROPEC/EAGE Annual Conference and Exhibition, 23-26 May 2011, Vienna, Austria	https://doi.org/10.2118/143054-MS	3D simulation - Eclipse 300 CO2STORE	Sherwood Formation, East Irish Sea, UK	Sherwood base case final model	L: 43.2 W:30.0 H:0.600	0.21	500	7000
Pruess & Nordbotten 2011	Pruess, K. and Nordbotten, J. 2011. Numerical Simulation Studies of the Long-term Evolution of a CO2 Plume in a Saline Aquifer with a Sloping Caprock. Transport in Porous Media, 90, 135-151	https://doi.org/10.1007/s11242-011-9729-6	2D simulation - TOUGH2-MP/ECO2N	Generic Continental USA	Base case large scale model	L: 110 H:0.200	0.15	500	418
Sato et al 2011	Sato, K., Mito, S., Horie, T., Ohkuma, H., Saito, H., Watanabe, J. and Yoshimura, T. 2011. Monitoring and simulation studies for assessing macro- and meso-scale migration of CO2 sequestered in an onshore aquifer: Experiences from the Nagaoka pilot site, Japan. International Journal of Greenhouse Gas Control, 5, 125-137	https://doi.org/10.1016/j.ijggc.2010.03.003	3D simulation - GEM, history matched	Nagaoka pilot site, Haizume Formation, Japan	Base case	L: 4.40 W:4.00 H:0.0571	0.20 - 0.23	<1 - 12	1000
Bonneville et al 2013	Bonneville, A., Gilmore, T., Sullivan, C., Vermeul, V., Kelley, M., White, S., Appriou, D., Bjornstad, B., et al. 2013. Evaluating the Suitability for CO2 Storage at the FutureGen 2.0 Site, Morgan County, Illinois, USA. In: Dixon, T. and Yamaji, K. (eds) Energy Procedia. Proceedings of the 11th International Conference on Greenhouse Gas Control Technologies, 18-22 November 2012, Kyoto, Japan, 37,…	https://doi.org/10.1016/j.egypro.2013.06.541	3D simulation - STOMP-CO2	Proposed FutureGen 2.0 site, Mt Simon Formation, Illinois, USA	Base case	L:>5.00 W:>5.00 H:0.156	not reported	not reported	100
Szulczewski et al 2013	Szulczewski, M. L., Hesse, M. A. and Juanes, R. 2013. Carbon dioxide dissolution in structural and stratigraphic traps. Journal of Fluid Mechanics, 736, 287-315	https://doi.org/10.1017/jfm.2013.511	2D analytical model	Generic aquifer	Thick reservoir, low permeability	L: 5.00 H: 0.200	0.15	10	10000000
Kempka et al 2014	Kempka, T., De Lucia, M. and Kühn, M. 2014. Geomechanical integrity verification and mineral trapping quantification for the Ketzin CO2 storage pilot site by coupled numerical simulations. In: Dixon, T., Herzog, H. and Twinning, S. (eds) Energy Procedia. 12th International Conference on Greenhouse Gas Control Technologies, 5-9 October 2014, Austin, USA, 63, 3330-3338	https://doi.org/10.1016/j.egypro.2014.11.361	3D simulation - Eclipse 100 + PHREEQC	Ketzin pilot site - Stuttgart Formation, Germany	Conservative mineral trapping	L:5.00 W:5.00 H:0.074	not reported	not reported	10000
Orsini et al 2014	Orsini, P., Cantucci, B. and Quattrocchi, F. 2014. Large-scale Numerical Modelling of CO2 Injection and Containment Phases for an Italian Near-coast Reservoir Using PFLOTRAN. In: Røkke, N, A. and Svendsen, H. (eds) Energy Procedia, 7th Trondheim Conference on CO2 capture, Transport and Storage, 4-6 June 2013, Trondheim, Norway, 51, 334-343	https://doi.org/10.1016/j.egypro.2014.07.040	3D simulation - PFLOWTRAN	Carbonate aquifer, offshore Italy	Base case	L:13.5 W:12.8 H:2.40	0.06 - 0.10	<1 - 25	2000
Alnes et al 2011	Alnes, H., Eiken, O., Nooner. S., Sasagawac, G., Stenvold, T and Zumberge M. 2011. Results from Sleipner gravity monitoring: Updated density and temperature distribution of the CO2 plume. In: Gale, J., Hendriks, C. and Turkenberg, W. (eds) Energy Procedia. 10th International Conference on Greenhouse Gas Control Technologies, 19-23 September 2010, Amsterdam, The Netherlands, 4, 5504-5511	https://doi.org/10.1016/j.egypro.2011.02.536	Gravimetric survey	Sleipner pilot site, Utsira Formation, North Sea, Norway	1.8% dissolved per year				13
Sathaye et al 2014	Sathaye, K. J., Hesse, M. A., Cassidy, M. and Stockli, D. F. 2014. Constraints on the magnitude and rate of CO2 dissolution at Bravo Dome natural gas field. Proceedings of the National Academy of Sciences of the United States of America, 43, 15332-15337	https://doi.org/10.1016/j.epsl.2016.03.014	Isotope geochemistry	Bravo Dome, New Mexico, USA	Mid case age				1350000
Zwahlen et al 2017	Zwahlen, C, A., Kampman, N., Dennis, P., Zhou, Z. and Holland, G. 2017. Estimating carbon dioxide residence time scales through noble gas and stable isotope diffusion profiles. Geology, 45, 995-998	https://doi.org/10.1130/G39291.1	Isotope geochemistry	Bravo Dome, New Mexico, USA	Mid case age				15500

## Sheet: 2. Scenario curves
Exponential functions used to produce curves in Fig. 1
	Scenario A									VERTICAL LINE INJECTION								Scenario B
	A: EXPONENTIAL DECAY FN					B: DERIVATIVE of A, dA/dt				100	0							A: POWER LAW DECAY FN					B: DERIVATIVE of A, dA/dt
	0.024	0.018	0.005			0.015				100	1.4							0.024	0.018	0.005			0
	TIME (YR)	1-EXP^-kt	-kt	k		TIME (YR)	Offset	EXP^-kt										TIME (YR)	1-EXP^-kt		k		TIME (YR)	Offset	EXP^-kt
	1	0.017839	-0.018	0.018		1	0.997161	0.982161		VERTICAL LINE STABLE EARLY								1	0.00498752	-0.005	0.005		1	0.995012	0.995012
	2	0.0353597	-0.036	0.018		2	0.97964	0.96464		500	0							2	0.00995017	-0.01	0.005		2	0.99005	0.99005
	3	0.0525679	-0.054	0.018		3	0.962432	0.947432		500	1.4							3	0.0148881	-0.015	0.005		3	0.985112	0.985112
	4	0.0694691	-0.072	0.018		4	0.945531	0.930531										4	0.0198013	-0.02	0.005		4	0.980199	0.980199
	5	0.0860688	-0.09	0.018		5	0.928931	0.913931										5	0.0246901	-0.025	0.005		5	0.97531	0.97531
	6	0.102372	-0.108	0.018		6	0.912628	0.897628										6	0.0295545	-0.03	0.005		6	0.970446	0.970446
	7	0.118385	-0.126	0.018		7	0.896615	0.881615										7	0.0343946	-0.035	0.005		7	0.965605	0.965605
	8	0.134112	-0.144	0.018		8	0.880888	0.865888										8	0.0392106	-0.04	0.005		8	0.960789	0.960789
	9	0.149559	-0.162	0.018		9	0.865441	0.850441										9	0.0440025	-0.045	0.005		9	0.955997	0.955997
	10	0.16473	-0.18	0.018		10	0.85027	0.83527										10	0.0487706	-0.05	0.005		10	0.951229	0.951229
	11	0.17963	-0.198	0.018		11	0.83537	0.82037										11	0.0535149	-0.055	0.005		11	0.946485	0.946485
	12	0.194265	-0.216	0.018		12	0.820735	0.805735										12	0.0582355	-0.06	0.005		12	0.941765	0.941765
	13	0.208638	-0.234	0.018		13	0.806362	0.791362										13	0.0629325	-0.065	0.005		13	0.937067	0.937067
	14	0.222755	-0.252	0.018		14	0.792245	0.777245										14	0.0676062	-0.07	0.005		14	0.932394	0.932394
	15	0.236621	-0.27	0.018		15	0.778379	0.763379										15	0.0722565	-0.075	0.005		15	0.927743	0.927743
	16	0.250238	-0.288	0.018		16	0.764762	0.749762										16	0.0768837	-0.08	0.005		16	0.923116	0.923116
	17	0.263613	-0.306	0.018		17	0.751387	0.736387										17	0.0814877	-0.085	0.005		17	0.918512	0.918512
	18	0.27675	-0.324	0.018		18	0.73825	0.72325										18	0.0860688	-0.09	0.005		18	0.913931	0.913931
	19	0.289652	-0.342	0.018		19	0.725348	0.710348										19	0.0906271	-0.095	0.005		19	0.909373	0.909373
	20	0.302324	-0.36	0.018		20	0.712676	0.697676										20	0.0951626	-0.1	0.005		20	0.904837	0.904837
	21	0.314769	-0.378	0.018		21	0.700231	0.685231										21	0.0996755	-0.105	0.005		21	0.900325	0.900325
	22	0.326993	-0.396	0.018		22	0.688007	0.673007										22	0.104166	-0.11	0.005		22	0.895834	0.895834
	23	0.338999	-0.414	0.018		23	0.676001	0.661001										23	0.108634	-0.115	0.005		23	0.891366	0.891366
	24	0.350791	-0.432	0.018		24	0.664209	0.649209										24	0.11308	-0.12	0.005		24	0.88692	0.88692
	25	0.362372	-0.45	0.018		25	0.652628	0.637628										25	0.117503	-0.125	0.005		25	0.882497	0.882497
	26	0.373746	-0.468	0.018		26	0.641254	0.626254										26	0.121905	-0.13	0.005		26	0.878095	0.878095
	27	0.384918	-0.486	0.018		27	0.630082	0.615082										27	0.126284	-0.135	0.005		27	0.873716	0.873716
	28	0.395891	-0.504	0.018		28	0.619109	0.604109										28	0.130642	-0.14	0.005		28	0.869358	0.869358
	29	0.406667	-0.522	0.018		29	0.608333	0.593333										29	0.134978	-0.145	0.005		29	0.865022	0.865022
	30	0.417252	-0.54	0.018		30	0.597748	0.582748										30	0.139292	-0.15	0.005		30	0.860708	0.860708
	31	0.427647	-0.558	0.018		31	0.587353	0.572353										31	0.143585	-0.155	0.005		31	0.856415	0.856415
	32	0.437858	-0.576	0.018		32	0.577142	0.562142										32	0.147856	-0.16	0.005		32	0.852144	0.852144
	33	0.447886	-0.594	0.018		33	0.567114	0.552114										33	0.152106	-0.165	0.005		33	0.847894	0.847894
	34	0.457735	-0.612	0.018		34	0.557265	0.542265										34	0.156335	-0.17	0.005		34	0.843665	0.843665
	35	0.467408	-0.63	0.018		35	0.547592	0.532592										35	0.160543	-0.175	0.005		35	0.839457	0.839457
	36	0.476909	-0.648	0.018		36	0.538091	0.523091										36	0.16473	-0.18	0.005		36	0.83527	0.83527
	37	0.48624	-0.666	0.018		37	0.52876	0.51376										37	0.168896	-0.185	0.005		37	0.831104	0.831104
	38	0.495405	-0.684	0.018		38	0.519595	0.504595										38	0.173041	-0.19	0.005		38	0.826959	0.826959
	39	0.504407	-0.702	0.018		39	0.510593	0.495593										39	0.177165	-0.195	0.005		39	0.822835	0.822835
	40	0.513248	-0.72	0.018		40	0.501752	0.486752										40	0.181269	-0.2	0.005		40	0.818731	0.818731
	41	0.521931	-0.738	0.018		41	0.493069	0.478069										41	0.185353	-0.205	0.005		41	0.814647	0.814647
	42	0.530459	-0.756	0.018		42	0.484541	0.469541										42	0.189416	-0.21	0.005		42	0.810584	0.810584
	43	0.538835	-0.774	0.018		43	0.476165	0.461165										43	0.193459	-0.215	0.005		43	0.806541	0.806541
	44	0.547062	-0.792	0.018		44	0.467938	0.452938										44	0.197481	-0.22	0.005		44	0.802519	0.802519
	45	0.555142	-0.81	0.018		45	0.459858	0.444858										45	0.201484	-0.225	0.005		45	0.798516	0.798516
	46	0.563078	-0.828	0.018		46	0.451922	0.436922										46	0.205466	-0.23	0.005		46	0.794534	0.794534
	47	0.570872	-0.846	0.018		47	0.444128	0.429128										47	0.209429	-0.235	0.005		47	0.790571	0.790571
	48	0.578527	-0.864	0.018		48	0.436473	0.421473										48	0.213372	-0.24	0.005		48	0.786628	0.786628
	49	0.586046	-0.882	0.018		49	0.428954	0.413954										49	0.217295	-0.245	0.005		49	0.782705	0.782705
	50	0.59343	-0.9	0.018		50	0.42157	0.40657										50	0.221199	-0.25	0.005		50	0.778801	0.778801
	51	0.600683	-0.918	0.018		51	0.414317	0.399317										51	0.225084	-0.255	0.005		51	0.774916	0.774916
	52	0.607807	-0.936	0.018		52	0.407193	0.392193										52	0.228948	-0.26	0.005		52	0.771052	0.771052
	53	0.614803	-0.954	0.018		53	0.400197	0.385197										53	0.232794	-0.265	0.005		53	0.767206	0.767206
	54	0.621674	-0.972	0.018		54	0.393326	0.378326										54	0.236621	-0.27	0.005		54	0.763379	0.763379
	55	0.628423	-0.99	0.018		55	0.386577	0.371577										55	0.240428	-0.275	0.005		55	0.759572	0.759572
	56	0.635052	-1.008	0.018		56	0.379948	0.364948										56	0.244216	-0.28	0.005		56	0.755784	0.755784
	57	0.641562	-1.026	0.018		57	0.373438	0.358438										57	0.247986	-0.285	0.005		57	0.752014	0.752014
	58	0.647956	-1.044	0.018		58	0.367044	0.352044										58	0.251736	-0.29	0.005		58	0.748264	0.748264
	59	0.654236	-1.062	0.018		59	0.360764	0.345764										59	0.255468	-0.295	0.005		59	0.744532	0.744532
	60	0.660404	-1.08	0.018		60	0.354596	0.339596										60	0.259182	-0.3	0.005		60	0.740818	0.740818
	61	0.666463	-1.098	0.018		61	0.348537	0.333537										61	0.262877	-0.305	0.005		61	0.737123	0.737123
	62	0.672412	-1.116	0.018		62	0.342588	0.327588										62	0.266553	-0.31	0.005		62	0.733447	0.733447
	63	0.678256	-1.134	0.018		63	0.336744	0.321744										63	0.270211	-0.315	0.005		63	0.729789	0.729789
	64	0.683996	-1.152	0.018		64	0.331004	0.316004										64	0.273851	-0.32	0.005		64	0.726149	0.726149
	65	0.689633	-1.17	0.018		65	0.325367	0.310367										65	0.277473	-0.325	0.005		65	0.722527	0.722527
	66	0.69517	-1.188	0.018		66	0.31983	0.30483										66	0.281076	-0.33	0.005		66	0.718924	0.718924
	67	0.700608	-1.206	0.018		67	0.314392	0.299392										67	0.284662	-0.335	0.005		67	0.715338	0.715338
	68	0.705948	-1.224	0.018		68	0.309052	0.294052										68	0.28823	-0.34	0.005		68	0.71177	0.71177
	69	0.711194	-1.242	0.018		69	0.303806	0.288806										69	0.29178	-0.345	0.005		69	0.70822	0.70822
	70	0.716346	-1.26	0.018		70	0.298654	0.283654										70	0.295312	-0.35	0.005		70	0.704688	0.704688
	71	0.721406	-1.278	0.018		71	0.293594	0.278594										71	0.298827	-0.355	0.005		71	0.701173	0.701173
	72	0.726376	-1.296	0.018		72	0.288624	0.273624										72	0.302324	-0.36	0.005		72	0.697676	0.697676
	73	0.731257	-1.314	0.018		73	0.283743	0.268743										73	0.305803	-0.365	0.005		73	0.694197	0.694197
	74	0.736051	-1.332	0.018		74	0.278949	0.263949										74	0.309266	-0.37	0.005		74	0.690734	0.690734
	75	0.74076	-1.35	0.018		75	0.27424	0.25924										75	0.312711	-0.375	0.005		75	0.687289	0.687289
	76	0.745384	-1.368	0.018		76	0.269616	0.254616										76	0.316139	-0.38	0.005		76	0.683861	0.683861
	77	0.749926	-1.386	0.018		77	0.265074	0.250074										77	0.319549	-0.385	0.005		77	0.680451	0.680451
	78	0.754387	-1.404	0.018		78	0.260613	0.245613										78	0.322943	-0.39	0.005		78	0.677057	0.677057
	79	0.758769	-1.422	0.018		79	0.256231	0.241231										79	0.32632	-0.395	0.005		79	0.67368	0.67368
	80	0.763072	-1.44	0.018		80	0.251928	0.236928										80	0.32968	-0.4	0.005		80	0.67032	0.67032
	81	0.767299	-1.458	0.018		81	0.247701	0.232701										81	0.333023	-0.405	0.005		81	0.666977	0.666977
	82	0.77145	-1.476	0.018		82	0.24355	0.22855										82	0.33635	-0.41	0.005		82	0.66365	0.66365
	83	0.775527	-1.494	0.018		83	0.239473	0.224473										83	0.33966	-0.415	0.005		83	0.66034	0.66034
	84	0.779531	-1.512	0.018		84	0.235469	0.220469										84	0.342953	-0.42	0.005		84	0.657047	0.657047
	85	0.783464	-1.53	0.018		85	0.231536	0.216536										85	0.34623	-0.425	0.005		85	0.65377	0.65377
	86	0.787327	-1.548	0.018		86	0.227673	0.212673										86	0.349491	-0.43	0.005		86	0.650509	0.650509
	87	0.791121	-1.566	0.018		87	0.223879	0.208879										87	0.352735	-0.435	0.005		87	0.647265	0.647265
	88	0.794847	-1.584	0.018		88	0.220153	0.205153										88	0.355964	-0.44	0.005		88	0.644036	0.644036
	89	0.798507	-1.602	0.018		89	0.216493	0.201493										89	0.359176	-0.445	0.005		89	0.640824	0.640824
	90	0.802101	-1.62	0.018		90	0.212899	0.197899										90	0.362372	-0.45	0.005		90	0.637628	0.637628
	91	0.805632	-1.638	0.018		91	0.209368	0.194368										91	0.365552	-0.455	0.005		91	0.634448	0.634448
	92	0.809099	-1.656	0.018		92	0.205901	0.190901										92	0.368716	-0.46	0.005		92	0.631284	0.631284
	93	0.812504	-1.674	0.018		93	0.202496	0.187496										93	0.371865	-0.465	0.005		93	0.628135	0.628135
	94	0.815849	-1.692	0.018		94	0.199151	0.184151										94	0.374998	-0.47	0.005		94	0.625002	0.625002
	95	0.819134	-1.71	0.018		95	0.195866	0.180866										95	0.378115	-0.475	0.005		95	0.621885	0.621885
	96	0.822361	-1.728	0.018		96	0.192639	0.177639										96	0.381217	-0.48	0.005		96	0.618783	0.618783
	97	0.82553	-1.746	0.018		97	0.18947	0.17447										97	0.384303	-0.485	0.005		97	0.615697	0.615697
	98	0.828642	-1.764	0.018		98	0.186358	0.171358										98	0.387374	-0.49	0.005		98	0.612626	0.612626
	99	0.831699	-1.782	0.018		99	0.183301	0.168301										99	0.390429	-0.495	0.005		99	0.609571	0.609571
	100	0.834701	-1.8	0.018		100	0.180299	0.165299										100	0.393469	-0.5	0.005		100	0.606531	0.606531
	110	0.861931	-1.98	0.018		110	0.153069	0.138069										110	0.42305	-0.55	0.005		110	0.57695	0.57695
	120	0.884675	-2.16	0.018		120	0.130325	0.115325										120	0.451188	-0.6	0.005		120	0.548812	0.548812
	130	0.903672	-2.34	0.018		130	0.111328	0.0963276										130	0.477954	-0.65	0.005		130	0.522046	0.522046
	140	0.91954	-2.52	0.018		140	0.0954596	0.0804596										140	0.503415	-0.7	0.005		140	0.496585	0.496585
	150	0.932794	-2.7	0.018		150	0.0822055	0.0672055										150	0.527633	-0.75	0.005		150	0.472367	0.472367
	160	0.943865	-2.88	0.018		160	0.0711348	0.0561348										160	0.550671	-0.8	0.005		160	0.449329	0.449329
	170	0.953112	-3.06	0.018		170	0.0618877	0.0468877										170	0.572585	-0.85	0.005		170	0.427415	0.427415
	180	0.960836	-3.24	0.018		180	0.0541639	0.0391639										180	0.59343	-0.9	0.005		180	0.40657	0.40657
	190	0.967288	-3.42	0.018		190	0.0477124	0.0327124										190	0.613259	-0.95	0.005		190	0.386741	0.386741
	200	0.972676	-3.6	0.018		200	0.0423237	0.0273237										200	0.632121	-1	0.005		200	0.367879	0.367879
	210	0.977177	-3.78	0.018		210	0.0378227	0.0228227										210	0.650062	-1.05	0.005		210	0.349938	0.349938
	220	0.980937	-3.96	0.018		220	0.0340631	0.0190631										220	0.667129	-1.1	0.005		220	0.332871	0.332871
	230	0.984077	-4.14	0.018		230	0.0309229	0.0159229										230	0.683363	-1.15	0.005		230	0.316637	0.316637
	240	0.9867	-4.32	0.018		240	0.0282999	0.0132999										240	0.698806	-1.2	0.005		240	0.301194	0.301194
	250	0.988891	-4.5	0.018		250	0.026109	0.011109										250	0.713495	-1.25	0.005		250	0.286505	0.286505
	260	0.990721	-4.68	0.018		260	0.024279	0.00927901										260	0.727468	-1.3	0.005		260	0.272532	0.272532
	270	0.99225	-4.86	0.018		270	0.0227505	0.00775048										270	0.74076	-1.35	0.005		270	0.25924	0.25924
	280	0.993526	-5.04	0.018		280	0.0214737	0.00647375										280	0.753403	-1.4	0.005		280	0.246597	0.246597
	290	0.994593	-5.22	0.018		290	0.0204073	0.00540733										290	0.76543	-1.45	0.005		290	0.23457	0.23457
	300	0.995483	-5.4	0.018		300	0.0195166	0.00451658										300	0.77687	-1.5	0.005		300	0.22313	0.22313
	310	0.996227	-5.58	0.018		310	0.0187726	0.00377257										310	0.787752	-1.55	0.005		310	0.212248	0.212248
	320	0.996849	-5.76	0.018		320	0.0181511	0.00315111										320	0.798103	-1.6	0.005		320	0.201897	0.201897
	330	0.997368	-5.94	0.018		330	0.017632	0.00263203										330	0.80795	-1.65	0.005		330	0.19205	0.19205
	340	0.997802	-6.12	0.018		340	0.0171985	0.00219846										340	0.817316	-1.7	0.005		340	0.182684	0.182684
	350	0.998164	-6.3	0.018		350	0.0168363	0.0018363										350	0.826226	-1.75	0.005		350	0.173774	0.173774
	360	0.998466	-6.48	0.018		360	0.0165338	0.00153381										360	0.834701	-1.8	0.005		360	0.165299	0.165299
	370	0.998719	-6.66	0.018		370	0.0162811	0.00128115										370	0.842763	-1.85	0.005		370	0.157237	0.157237
	380	0.99893	-6.84	0.018		380	0.0160701	0.0010701										380	0.850431	-1.9	0.005		380	0.149569	0.149569
	390	0.999106	-7.02	0.018		390	0.0158938	0.000893825										390	0.857726	-1.95	0.005		390	0.142274	0.142274
	400	0.999253	-7.2	0.018		400	0.0157466	0.000746586										400	0.864665	-2	0.005		400	0.135335	0.135335
	410	0.999376	-7.38	0.018		410	0.0156236	0.000623601										410	0.871265	-2.05	0.005		410	0.128735	0.128735
	420	0.999479	-7.56	0.018		420	0.0155209	0.000520875										420	0.877544	-2.1	0.005		420	0.122456	0.122456
	430	0.999565	-7.74	0.018		430	0.0154351	0.000435072										430	0.883516	-2.15	0.005		430	0.116484	0.116484
	440	0.999637	-7.92	0.018		440	0.0153634	0.000363402										440	0.889197	-2.2	0.005		440	0.110803	0.110803
	450	0.999696	-8.1	0.018		450	0.0153035	0.000303539										450	0.894601	-2.25	0.005		450	0.105399	0.105399
	460	0.999746	-8.28	0.018		460	0.0152535	0.000253537										460	0.899741	-2.3	0.005		460	0.100259	0.100259
	470	0.999788	-8.46	0.018		470	0.0152118	0.000211772										470	0.904631	-2.35	0.005		470	0.0953692	0.0953692
	480	0.999823	-8.64	0.018		480	0.0151769	0.000176887										480	0.909282	-2.4	0.005		480	0.090718	0.090718
	490	0.999852	-8.82	0.018		490	0.0151477	0.000147748										490	0.913706	-2.45	0.005		490	0.0862936	0.0862936
	500	0.999877	-9	0.018		500	0.0151234	0.00012341										500	0.917915	-2.5	0.005		500	0.082085	0.082085
	1000	1	-18	0.018		1000	0	1.523e-08										510	0.921918	-2.55	0.005		510	0.0780817	0.0780817
																		520	0.925726	-2.6	0.005		520	0.0742736	0.0742736
																		530	0.929349	-2.65	0.005		530	0.0706512	0.0706512
																		540	0.932794	-2.7	0.005		540	0.0672055	0.0672055
																		550	0.936072	-2.75	0.005		550	0.0639279	0.0639279
																		560	0.93919	-2.8	0.005		560	0.0608101	0.0608101
																		570	0.942156	-2.85	0.005		570	0.0578443	0.0578443
																		580	0.944977	-2.9	0.005		580	0.0550232	0.0550232
																		590	0.94766	-2.95	0.005		590	0.0523397	0.0523397
																		600	0.950213	-3	0.005		600	0.0497871	0.0497871
																		610	0.952641	-3.05	0.005		610	0.0473589	0.0473589
																		620	0.954951	-3.1	0.005		620	0.0450492	0.0450492
																		630	0.957148	-3.15	0.005		630	0.0428521	0.0428521
																		640	0.959238	-3.2	0.005		640	0.0407622	0.0407622
																		650	0.961226	-3.25	0.005		650	0.0387742	0.0387742
																		660	0.963117	-3.3	0.005		660	0.0368832	0.0368832
																		670	0.964916	-3.35	0.005		670	0.0350844	0.0350844
																		680	0.966627	-3.4	0.005		680	0.0333733	0.0333733
																		690	0.968254	-3.45	0.005		690	0.0317456	0.0317456
																		700	0.969803	-3.5	0.005		700	0.0301974	0.0301974
																		710	0.971275	-3.55	0.005		710	0.0287246	0.0287246
																		720	0.972676	-3.6	0.005		720	0.0273237	0.0273237
																		730	0.974009	-3.65	0.005		730	0.0259911	0.0259911
																		740	0.975276	-3.7	0.005		740	0.0247235	0.0247235
																		750	0.976482	-3.75	0.005		750	0.0235177	0.0235177
																		760	0.977629	-3.8	0.005		760	0.0223708	0.0223708
																		770	0.97872	-3.85	0.005		770	0.0212797	0.0212797
																		780	0.979758	-3.9	0.005		780	0.0202419	0.0202419
																		790	0.980745	-3.95	0.005		790	0.0192547	0.0192547
																		800	0.981684	-4	0.005		800	0.0183156	0.0183156
																		810	0.982578	-4.05	0.005		810	0.0174224	0.0174224
																		820	0.983427	-4.1	0.005		820	0.0165727	0.0165727
																		830	0.984236	-4.15	0.005		830	0.0157644	0.0157644
																		840	0.985004	-4.2	0.005		840	0.0149956	0.0149956
																		850	0.985736	-4.25	0.005		850	0.0142642	0.0142642
																		860	0.986431	-4.3	0.005		860	0.0135686	0.0135686
																		870	0.987093	-4.35	0.005		870	0.0129068	0.0129068
																		880	0.987723	-4.4	0.005		880	0.0122773	0.0122773
																		890	0.988321	-4.45	0.005		890	0.0116786	0.0116786
																		900	0.988891	-4.5	0.005		900	0.011109	0.011109
																		910	0.989433	-4.55	0.005		910	0.0105672	0.0105672
																		920	0.989948	-4.6	0.005		920	0.0100518	0.0100518
																		930	0.990438	-4.65	0.005		930	0.0095616	0.0095616
																		940	0.990905	-4.7	0.005		940	0.00909528	0.00909528
																		950	0.991348	-4.75	0.005		950	0.0086517	0.0086517
																		960	0.99177	-4.8	0.005		960	0.00822975	0.00822975
																		970	0.992172	-4.85	0.005		970	0.00782838	0.00782838
																		980	0.992553	-4.9	0.005		980	0.00744658	0.00744658
																		990	0.992917	-4.95	0.005		990	0.00708341	0.00708341
																		1000	0.993262	-5	0.005		1000	0	0.00673795

## Sheet: 3. Bravo Dome
Bravo Dome dissolution rate calculations (Table 1)
Sathaye et al 2014			Zwahlen et al 2017
Dissolved mass (Mt)	366		Dissolved mass (Mt)	506
Error (Mt)	+/-120		Error (Mt)	+/-166
Loss Fraction	0.22		Loss Fraction	0.28
Original mass (Mt)	1600		Original mass (Mt)	1800
Error (Mt)	+/-670		Error (Mt)	+/-670
Min age estimate (Ka)	1200		Min age estimate (Ka)	14.1
Error (Ka)	+/-100		Error (Ka)	+/- 0.2
Max age estimate (Ka)	1500		Max age estimate (Ka)	16.9
Error (Ka)	+/-100		Error (Ka)	+1.1 / -0.5
Mid case age estimate (Ka)	1350		Mid case age estimate (Ka)	15.5
Mid case rate estimate (Mt/Ka)	0.271111		Mid case rate estimate (Mt/Ka)	32.6452

## Sheet: 4. Average rates
Average dissolution rate calculations (Figs 3-5)						(Table 2)							Calculation of Sleipner dissolution from 1996 to 2009, after Alnes et al (2011) estimate of 1.8% per year										Fig 5. correlation lines
Study	CO2 dissolved (Mt)	Total CO2 mass (Mt)	Duration (yr)	Scaled average dissolution rate (fraction CO2/yr)		Fraction Dissolved							Time (yr)	Mass injected (Mt)	Dissolved mass (Mt)	Cummulative Mass Dissolved (Mt)	%/yr	Fraction Dissolved					High line	EXP	Mid line	EXP	Low line	EXP
Ozah et al 2005	15	48	10000	3.125e-05		0.3125							1	0.869231	0.0156462	0.0156462	1.8	0.018						R^2=0.981		R^2=0.634		R^2=0.989
Pickup et al 2011	81	225	7000	5.14286e-05		0.36							2	1.73846	0.0312923	0.0469385	1.8	0.027					100	0.000702675	100	0.000405229	100	0.000190469
Pruess & Nordbotten 2011	0.0142	0.16	418	0.000212321		0.08875							3	2.60769	0.0469385	0.0938769	1.8	0.036					200	0.000686927	200	0.000396856	200	0.000187355
Sato et al 2011	0.0061256	0.0104	1000	0.000589		0.589							4	3.47692	0.0625846	0.156462	1.8	0.045					300	0.000671532	300	0.000388657	300	0.000184292
Bonneville et al 2013	6	33	100	0.00181818		0.181818							5	4.34615	0.0782308	0.234692	1.8	0.054					400	0.000656482	400	0.000380626	400	0.00018128
Szulczewski et al 2013	3214	3214	10000000	1e-07		Not calculated as study uses constant supply of CO2 above reservoir							6	5.21538	0.0938769	0.328569	1.8	0.063					500	0.00064177	500	0.000372762	500	0.000178316
Kempka et al 2014	0.059764	0.067	10000	8.92e-05		0.892							7	6.08462	0.109523	0.438092	1.8	0.072					600	0.000627387	600	0.00036506	600	0.000175401
Orsini et al 2014	23.7	30	2000	0.000395		0.79							8	6.95385	0.125169	0.563262	1.8	0.081					700	0.000613326	700	0.000357518	700	0.000172534
Alnes et al 2011	1.4238	11.3	13	0.00969231		0.126							9	7.82308	0.140815	0.704077	1.8	0.09					800	0.000599581	800	0.000350131	800	0.000169713
Sathaye et al 2014	366	1600	1350000	1.69444e-07		0.22875							10	8.69231	0.156462	0.860538	1.8	0.099					900	0.000586143	900	0.000342897	900	0.000166939
Zwahlen et al 2017	506	1800	15500	1.81362e-05		0.281111							11	9.56154	0.172108	1.03265	1.8	0.108					1000	0.000573007	1000	0.000335812	1000	0.00016421
													12	10.4308	0.187754	1.2204	1.8	0.117					1100	0.000560165	1100	0.000328874	1100	0.000161526
Analogue study error points													13	11.3	0.2034	1.4238	1.8	0.126					1200	0.000547611	1200	0.000322079	1200	0.000158885
Study	CO2 dissolved (Mt)	Total CO2 mass (Mt)	Duration (yr)	Scaled average dissolution rate (fraction CO2/yr)		Fraction Dissolved																	1300	0.000535338	1300	0.000315424	1300	0.000156288
Sathaye et al 2014 MIN	246	2270	1350000	8.02741e-08		0.10837							Kempka et al 2014 range										1400	0.000523341	1400	0.000308907	1400	0.000153733
Sathaye et al 2014 MAX	486	930	1350000	3.87097e-07		0.522581							Case	Fraction Dissolved									1500	0.000511612	1500	0.000302525	1500	0.00015122
Zwahlen et al 2017 MIN	340	2470	15500	8.88076e-06		0.137652							High	0.892									1600	0.000500146	1600	0.000296274	1600	0.000148748
Zwahlen et al 2017 MAX	672	1130	15500	3.83671e-05		0.59469							Average	0.818									1700	0.000488937	1700	0.000290153	1700	0.000146316
													Low	0.744									1800	0.000477979	1800	0.000284158	1800	0.000143924
																							1900	0.000467267	1900	0.000278287	1900	0.000141571
																							2000	0.000456795	2000	0.000272537	2000	0.000139257
																							2100	0.000446558	2100	0.000266906	2100	0.000136981
																							2200	0.00043655	2200	0.000261391	2200	0.000134741
																							2300	0.000426766	2300	0.00025599	2300	0.000132539
																							2400	0.000417202	2400	0.000250701	2400	0.000130372
																							2500	0.000407852	2500	0.000245522	2500	0.000128241
																							2600	0.000398711	2600	0.000240449	2600	0.000126144
																							2700	0.000389775	2700	0.000235481	2700	0.000124082
																							2800	0.00038104	2800	0.000230615	2800	0.000122054
																							2900	0.0003725	2900	0.000225851	2900	0.000120059
																							3000	0.000364152	3000	0.000221184	3000	0.000118096
																							3100	0.000355991	3100	0.000216614	3100	0.000116165
																							3200	0.000348013	3200	0.000212139	3200	0.000114266
																							3300	0.000340213	3300	0.000207756	3300	0.000112398
																							3400	0.000332589	3400	0.000203463	3400	0.000110561
																							3500	0.000325135	3500	0.000199259	3500	0.000108754
																							3600	0.000317848	3600	0.000195142	3600	0.000106976
																							3700	0.000310725	3700	0.00019111	3700	0.000105227
																							3800	0.000303761	3800	0.000187162	3800	0.000103507
																							3900	0.000296953	3900	0.000183295	3900	0.000101815
																							4000	0.000290298	4000	0.000179508	4000	0.00010015
																							4100	0.000283792	4100	0.000175799	4100	9.85133e-05
																							4200	0.000277432	4200	0.000172166	4200	9.69029e-05
																							4300	0.000271214	4300	0.000168609	4300	9.53188e-05
																							4400	0.000265136	4400	0.000165126	4400	9.37605e-05
																							4500	0.000259194	4500	0.000161714	4500	9.22278e-05
																							4600	0.000253385	4600	0.000158373	4600	9.07201e-05
																							4700	0.000247707	4700	0.0001551	4700	8.92371e-05
																							4800	0.000242155	4800	0.000151896	4800	8.77783e-05
																							4900	0.000236728	4900	0.000148757	4900	8.63434e-05
																							5000	0.000231423	5000	0.000145684	5000	8.49319e-05
																							5100	0.000226236	5100	0.000142674	5100	8.35435e-05
																							5200	0.000221166	5200	0.000139726	5200	8.21778e-05
																							5300	0.000216209	5300	0.000136839	5300	8.08344e-05
																							5400	0.000211364	5400	0.000134012	5400	7.9513e-05
																							5500	0.000206627	5500	0.000131243	5500	7.82131e-05
																							5600	0.000201996	5600	0.000128531	5600	7.69346e-05
																							5700	0.000197469	5700	0.000125876	5700	7.56769e-05
																							5800	0.000193043	5800	0.000123275	5800	7.44398e-05
																							5900	0.000188717	5900	0.000120728	5900	7.32229e-05
																							6000	0.000184488	6000	0.000118234	6000	7.20259e-05
																							6100	0.000180353	6100	0.000115791	6100	7.08485e-05
																							6200	0.000176311	6200	0.000113398	6200	6.96903e-05
																							6300	0.00017236	6300	0.000111055	6300	6.8551e-05
																							6400	0.000168497	6400	0.000108761	6400	6.74304e-05
																							6500	0.000164721	6500	0.000106514	6500	6.63281e-05
																							6600	0.000161029	6600	0.000104313	6600	6.52438e-05
																							6700	0.00015742	6700	0.000102158	6700	6.41773e-05
																							6800	0.000153892	6800	0.000100047	6800	6.31281e-05
																							6900	0.000150443	6900	9.79798e-05	6900	6.20962e-05
																							7000	0.000147072	7000	9.59554e-05	7000	6.10811e-05
																							7100	0.000143776	7100	9.39728e-05	7100	6.00825e-05
																							7200	0.000140553	7200	9.20312e-05	7200	5.91004e-05
																							7300	0.000137403	7300	9.01297e-05	7300	5.81342e-05
																							7400	0.000134324	7400	8.82675e-05	7400	5.71839e-05
																							7500	0.000131314	7500	8.64438e-05	7500	5.62491e-05
																							7600	0.000128371	7600	8.46578e-05	7600	5.53296e-05
																							7700	0.000125494	7700	8.29086e-05	7700	5.44251e-05
																							7800	0.000122681	7800	8.11956e-05	7800	5.35354e-05
																							7900	0.000119932	7900	7.9518e-05	7900	5.26602e-05
																							8000	0.000117244	8000	7.7875e-05	8000	5.17994e-05
																							8100	0.000114616	8100	7.6266e-05	8100	5.09526e-05
																							8200	0.000112048	8200	7.46903e-05	8200	5.01196e-05
																							8300	0.000109537	8300	7.31471e-05	8300	4.93003e-05
																							8400	0.000107082	8400	7.16358e-05	8400	4.84944e-05
																							8500	0.000104682	8500	7.01557e-05	8500	4.77016e-05
																							8600	0.000102336	8600	6.87062e-05	8600	4.69218e-05
																							8700	0.000100042	8700	6.72866e-05	8700	4.61548e-05
																							8800	9.78002e-05	8800	6.58964e-05	8800	4.54003e-05
																							8900	9.56084e-05	8900	6.45349e-05	8900	4.46581e-05
																							9000	9.34656e-05	9000	6.32015e-05	9000	4.39281e-05
																							9100	9.1371e-05	9100	6.18956e-05	9100	4.321e-05
																							9200	8.93232e-05	9200	6.06168e-05	9200	4.25036e-05
																							9300	8.73214e-05	9300	5.93644e-05	9300	4.18088e-05
																							9400	8.53644e-05	9400	5.81378e-05	9400	4.11253e-05
																							9500	8.34512e-05	9500	5.69366e-05	9500	4.0453e-05
																							9600	8.1581e-05	9600	5.57602e-05	9600	3.97917e-05
																							9700	7.97526e-05	9700	5.46081e-05	9700	3.91413e-05
																							9800	7.79653e-05	9800	5.34799e-05	9800	3.85014e-05
																							9900	7.6218e-05	9900	5.23749e-05	9900	3.7872e-05
																							10000	7.45098e-05	10000	5.12928e-05	10000	3.72529e-05
																							10100	7.284e-05	10100	5.0233e-05	10100	3.66439e-05
																							10200	7.12075e-05	10200	4.91951e-05	10200	3.60449e-05
																							10300	6.96117e-05	10300	4.81787e-05	10300	3.54556e-05
																							10400	6.80516e-05	10400	4.71832e-05	10400	3.4876e-05
																							10500	6.65264e-05	10500	4.62084e-05	10500	3.43059e-05
																							10600	6.50355e-05	10600	4.52536e-05	10600	3.37451e-05
																							10700	6.3578e-05	10700	4.43186e-05	10700	3.31935e-05
																							10800	6.21531e-05	10800	4.34029e-05	10800	3.26508e-05
																							10900	6.07602e-05	10900	4.25062e-05	10900	3.21171e-05
																							11000	5.93984e-05	11000	4.16279e-05	11000	3.15921e-05
																							11100	5.80672e-05	11100	4.07679e-05	11100	3.10756e-05
																							11200	5.67659e-05	11200	3.99255e-05	11200	3.05676e-05
																							11300	5.54937e-05	11300	3.91006e-05	11300	3.00679e-05
																							11400	5.425e-05	11400	3.82927e-05	11400	2.95764e-05
																							11500	5.30342e-05	11500	3.75016e-05	11500	2.90929e-05
																							11600	5.18456e-05	11600	3.67267e-05	11600	2.86173e-05
																							11700	5.06837e-05	11700	3.59679e-05	11700	2.81495e-05
																							11800	4.95478e-05	11800	3.52248e-05	11800	2.76893e-05
																							11900	4.84373e-05	11900	3.4497e-05	11900	2.72367e-05
																							12000	4.73518e-05	12000	3.37842e-05	12000	2.67914e-05
																							12100	4.62906e-05	12100	3.30862e-05	12100	2.63535e-05
																							12200	4.52532e-05	12200	3.24026e-05	12200	2.59226e-05
																							12300	4.4239e-05	12300	3.17331e-05	12300	2.54989e-05
																							12400	4.32475e-05	12400	3.10774e-05	12400	2.5082e-05
																							12500	4.22783e-05	12500	3.04353e-05	12500	2.4672e-05
																							12600	4.13308e-05	12600	2.98065e-05	12600	2.42687e-05
																							12700	4.04045e-05	12700	2.91907e-05	12700	2.3872e-05
																							12800	3.9499e-05	12800	2.85875e-05	12800	2.34817e-05
																							12900	3.86137e-05	12900	2.79969e-05	12900	2.30979e-05
																							13000	3.77484e-05	13000	2.74184e-05	13000	2.27203e-05
																							13100	3.69024e-05	13100	2.68519e-05	13100	2.23489e-05
																							13200	3.60753e-05	13200	2.62971e-05	13200	2.19835e-05
																							13300	3.52668e-05	13300	2.57538e-05	13300	2.16241e-05
																							13400	3.44765e-05	13400	2.52217e-05	13400	2.12706e-05
																							13500	3.37038e-05	13500	2.47006e-05	13500	2.09229e-05
																							13600	3.29484e-05	13600	2.41902e-05	13600	2.05809e-05
																							13700	3.221e-05	13700	2.36904e-05	13700	2.02445e-05
																							13800	3.14882e-05	13800	2.32009e-05	13800	1.99135e-05
																							13900	3.07825e-05	13900	2.27216e-05	13900	1.9588e-05
																							14000	3.00926e-05	14000	2.22521e-05	14000	1.92678e-05
																							14100	2.94182e-05	14100	2.17924e-05	14100	1.89528e-05
																							14200	2.87589e-05	14200	2.13421e-05	14200	1.8643e-05
																							14300	2.81143e-05	14300	2.09012e-05	14300	1.83382e-05
																							14400	2.74843e-05	14400	2.04693e-05	14400	1.80384e-05
																							14500	2.68683e-05	14500	2.00464e-05	14500	1.77435e-05
																							14600	2.62662e-05	14600	1.96322e-05	14600	1.74535e-05
																							14700	2.56775e-05	14700	1.92266e-05	14700	1.71682e-05
																							14800	2.5102e-05	14800	1.88293e-05	14800	1.68875e-05
																							14900	2.45395e-05	14900	1.84403e-05	14900	1.66114e-05
																							15000	2.39895e-05	15000	1.80593e-05	15000	1.63399e-05
																							15100	2.34519e-05	15100	1.76861e-05	15100	1.60728e-05
																							15200	2.29263e-05	15200	1.73207e-05	15200	1.581e-05
																							15300	2.24125e-05	15300	1.69629e-05	15300	1.55516e-05
																							15400	2.19102e-05	15400	1.66124e-05	15400	1.52974e-05
																							15500	2.14191e-05	15500	1.62691e-05	15500	1.50473e-05
																							15600	2.09391e-05	15600	1.5933e-05	15600	1.48013e-05
																							15700	2.04698e-05	15700	1.56038e-05	15700	1.45593e-05
																							15800	2.00111e-05	15800	1.52814e-05	15800	1.43213e-05
																							15900	1.95626e-05	15900	1.49657e-05	15900	1.40872e-05
																							16000	1.91242e-05	16000	1.46565e-05	16000	1.38569e-05
																							16100	1.86956e-05	16100	1.43536e-05	16100	1.36304e-05
																							16200	1.82766e-05	16200	1.40571e-05	16200	1.34076e-05
																							16300	1.7867e-05	16300	1.37666e-05	16300	1.31884e-05
																							16400	1.74666e-05	16400	1.34822e-05	16400	1.29728e-05
																							16500	1.70751e-05	16500	1.32036e-05	16500	1.27607e-05
																							16600	1.66924e-05	16600	1.29308e-05	16600	1.25521e-05
																							16700	1.63183e-05	16700	1.26637e-05	16700	1.23469e-05
																							16800	1.59526e-05	16800	1.2402e-05	16800	1.21451e-05
																							16900	1.55951e-05	16900	1.21458e-05	16900	1.19466e-05
																							17000	1.52456e-05	17000	1.18948e-05	17000	1.17513e-05
																							17100	1.49039e-05	17100	1.16491e-05	17100	1.15592e-05
																							17200	1.45699e-05	17200	1.14084e-05	17200	1.13702e-05
																							17300	1.42434e-05	17300	1.11727e-05	17300	1.11843e-05
																							17400	1.39241e-05	17400	1.09418e-05	17400	1.10015e-05
																							17500	1.36121e-05	17500	1.07157e-05	17500	1.08217e-05
																							17600	1.3307e-05	17600	1.04943e-05	17600	1.06448e-05
																							17700	1.30088e-05	17700	1.02775e-05	17700	1.04707e-05
																							17800	1.27173e-05	17800	1.00652e-05	17800	1.02996e-05
																							17900	1.24322e-05	17900	9.85721e-06	17900	1.01312e-05
																							18000	1.21536e-05	18000	9.65355e-06	18000	9.96559e-06
																							18100	1.18812e-05	18100	9.45409e-06	18100	9.80268e-06
																							18200	1.1615e-05	18200	9.25876e-06	18200	9.64243e-06
																							18300	1.13547e-05	18300	9.06746e-06	18300	9.4848e-06
																							18400	1.11002e-05	18400	8.88011e-06	18400	9.32975e-06
																							18500	1.08514e-05	18500	8.69664e-06	18500	9.17723e-06
																							18600	1.06082e-05	18600	8.51695e-06	18600	9.02721e-06
																							18700	1.03705e-05	18700	8.34098e-06	18700	8.87964e-06
																							18800	1.01381e-05	18800	8.16865e-06	18800	8.73448e-06
																							18900	9.91085e-06	18900	7.99987e-06	18900	8.5917e-06
																							19000	9.68874e-06	19000	7.83458e-06	19000	8.45125e-06
																							19100	9.4716e-06	19100	7.67271e-06	19100	8.31309e-06
																							19200	9.25933e-06	19200	7.51418e-06	19200	8.17719e-06
																							19300	9.05181e-06	19300	7.35893e-06	19300	8.04352e-06
																							19400	8.84895e-06	19400	7.20688e-06	19400	7.91203e-06
																							19500	8.65063e-06	19500	7.05798e-06	19500	7.78269e-06
																							19600	8.45676e-06	19600	6.91215e-06	19600	7.65546e-06
																							19700	8.26723e-06	19700	6.76934e-06	19700	7.53032e-06
																							19800	8.08195e-06	19800	6.62947e-06	19800	7.40722e-06
																							19900	7.90083e-06	19900	6.4925e-06	19900	7.28613e-06
																							100000	1.02979e-13	100000	3.54531e-13	100000	1.34514e-11

## Sheet: 5. Time series
Dissolution rate over time plots (Fig. 6)
Time series data extracted from model study plots (sheets 6 - 11)
Data extracted with WebPlotDigitizer tool
Author: Ankit Rohatgi
Title: WebPlotDigitizer
Website: https://automeris.io/WebPlotDigitizer
Version: 4.3
Date: July, 2020
E-Mail: ankitrohatgi@hotmail.com
Location: Pacifica, California, USA
Studies (Pickup et al., 2011) and (Orsini et al., 2014) did not publish dissolution over time plots and therefore are not included
Average rates from analogue and pilot studies for comparison
Study	Case	CO2 dissolved (Mt)	Total CO2 mass (Mt)	Duration (yr)	Scaled average dissolution rate (fraction CO2/yr)
Alnes et al 2011	1.8% dissolved per yr	see sheet 4
Sathaye et al 2014	Mid case first 5Ka (40% of total dissolution)	146.4	1600	5000	1.83e-05
Sathaye et al 2014	Mid case long term rate (60% of total dissolution)	219.6	1600	1345000	1.02045e-07
Zwahlen et al 2017	Mid case	see sheet 4

## Sheet: 6. Ozah 2005
Ozah et al 2005										Total CO2 mass (Mt)	48
										Cumulative time (yr)	Time step (yr)	Cumulative mass dissolved (Mt)	Mass step (Mt)	Scaled mass step	Scaled rate (fraction CO2/yr)
										0	0	0	0	0	0
										51.1619	51.1619	7.14986	7.14986	0.148955	0.00291145
										63.0636	11.9017	7.31741	0.167552	0.00349066	0.000293291
										75.1319	12.0683	7.50299	0.185585	0.00386635	0.000320373
										93.4013	18.2694	7.64536	0.142366	0.00296596	0.000162346
										102.569	9.1677	7.74511	0.0997468	0.00207806	0.000226672
										119.843	17.2738	7.91671	0.171601	0.00357503	0.000206962
										140.709	20.8657	8.01878	0.10207	0.00212645	0.000101911
										161.238	20.5293	8.20922	0.190439	0.00396749	0.00019326
										188.654	27.4163	8.37624	0.167021	0.00347959	0.000126917
										205.63	16.9754	8.44328	0.0670462	0.0013968	8.22835e-05
										228.854	23.224	8.59877	0.155483	0.00323922	0.000139477
										260.971	32.1171	8.76553	0.166758	0.00347413	0.000108171
										303.442	42.471	9.01826	0.25273	0.00526521	0.000123972
										342.677	39.235	9.23699	0.218736	0.004557	0.000116146
										398.445	55.7681	9.51172	0.27473	0.00572354	0.000102631
										451.059	52.6145	9.70848	0.19676	0.00409917	7.79096e-05
										494.009	42.9499	9.91894	0.210459	0.00438456	0.000102085
										549.269	55.2594	10.1103	0.191314	0.0039857	7.21271e-05
										596.616	47.3477	10.2995	0.189238	0.00394245	8.32659e-05
										721.236	124.62	10.7709	0.471458	0.00982205	7.88159e-05
										808.79	87.5535	11.001	0.230082	0.00479338	5.47479e-05
										915.343	106.553	11.3056	0.304531	0.0063444	5.95421e-05
										1013.78	98.4369	11.4922	0.186679	0.00388914	3.9509e-05
										1150.44	136.664	11.7643	0.272087	0.00566848	4.14776e-05
										1283.49	133.05	11.973	0.208656	0.004347	3.26719e-05
										1390.75	107.253	12.1048	0.131775	0.00274532	2.55968e-05
										1562.95	172.203	12.3265	0.22175	0.00461978	2.68276e-05
										1799.71	236.766	12.5999	0.273378	0.00569537	2.40549e-05
										2092.6	292.89	12.8533	0.253426	0.00527971	1.80263e-05
										2409.61	317.001	13.1364	0.283045	0.00589677	1.86017e-05
										2812.37	402.765	13.2806	0.144239	0.00300498	7.46089e-06
										3138.47	326.102	13.4134	0.132841	0.00276753	8.48671e-06
										3560.73	422.261	13.6208	0.207405	0.00432094	1.02329e-05
										3843.56	282.828	13.7188	0.0979304	0.00204022	7.21362e-06
										4361.7	518.136	13.875	0.156206	0.00325429	6.28077e-06
										4944.87	583.171	14.0779	0.202934	0.00422779	7.24965e-06
										5524.03	579.167	14.2082	0.130314	0.00271487	4.68755e-06
										6332.92	808.885	14.4039	0.195696	0.00407699	5.04026e-06
										7163.37	830.451	14.5639	0.159992	0.00333317	4.01369e-06
										8037.3	873.931	14.7464	0.182467	0.00380139	4.34976e-06
										8959.56	922.256	14.8363	0.0899439	0.00187383	2.03179e-06
										10000	1040.44	15	0.163673	0.00340986	3.27732e-06

## Sheet: 7. P. & N. 2011
Pruess & Nordbotten 2011												Total CO2 mass (Mt)	0.16
												Cumulative time (10^9 s)	Cumulative time (yr)	Time step (yr)	Cumulative mass dissolved (Kt)	Cumulative mass dissolved (Mt)	Mass step (Mt)	Scaled mass step	Scaled rate (fraction CO2/yr)
												0	0	0	0	0	0	0	0
												0.0518212	1.64324	1.64324	3.24264	0.00324264	0.00324264	0.0202665	0.0123332
												0.128265	4.06725	2.42401	3.7871	0.0037871	0.000544459	0.00340287	0.00140382
												0.19631	6.22494	2.15769	4.16165	0.00416165	0.000374551	0.00234094	0.00108493
												0.264429	8.38498	2.16005	4.45052	0.00445052	0.000288873	0.00180546	0.000835843
												0.357987	11.3517	2.96672	4.96922	0.00496922	0.000518698	0.00324186	0.00109274
												0.46005	14.5881	3.23638	5.53655	0.00553655	0.000567326	0.00354579	0.0010956
												0.587482	18.629	4.04087	6.41304	0.00641304	0.000876497	0.00547811	0.00135568
												0.775404	24.5879	5.95896	6.52289	0.00652289	0.00010985	0.000686565	0.000115215
												0.987665	31.3186	6.73073	6.72413	0.00672413	0.000201233	0.00125771	0.00018686
												1.09989	34.8773	3.55861	6.83676	0.00683676	0.000112638	0.000703989	0.000197827
												1.33895	42.4579	7.58069	7.10169	0.00710169	0.000264928	0.0016558	0.000218423
												1.59512	50.5809	8.123	7.35525	0.00735525	0.00025356	0.00158475	0.000195094
												1.81146	57.4409	6.85995	7.55017	0.00755017	0.000194915	0.00121822	0.000177584
												1.9282	61.1427	3.7018	7.61771	0.00761771	6.75388e-05	0.000422118	0.00011403
												2.15876	68.4538	7.31111	7.83111	0.00783111	0.000213405	0.00133378	0.000182432
												2.36586	75.0209	6.56711	7.99906	0.00799906	0.000167948	0.00104968	0.000159838
												2.51013	79.5959	4.57494	8.10853	0.00810853	0.000109475	0.000684218	0.000149558
												2.72242	86.3274	6.73157	8.2795	0.0082795	0.000170965	0.00106853	0.000158734
												2.97863	94.4516	8.1242	8.48948	0.00848948	0.000209984	0.0013124	0.000161542
												3.19094	101.184	6.73235	8.63203	0.00863203	0.000142546	0.000890911	0.000132333
												3.31174	105.015	3.83067	8.70605	0.00870605	7.4017e-05	0.000462607	0.000120764
												3.54235	112.327	7.3126	8.86524	0.00886524	0.000159199	0.000994992	0.000136065
												3.75466	119.06	6.73238	9.00666	0.00900666	0.000141418	0.000883863	0.000131285
												3.8897	123.342	4.28189	9.09681	0.00909681	9.01437e-05	0.000563398	0.000131577
												4.10607	130.203	6.86109	9.25048	0.00925048	0.000153673	0.000960455	0.000139986
												4.3623	138.328	8.12512	9.42731	0.00942731	0.000176829	0.00110518	0.00013602
												4.56304	144.693	6.36537	9.54039	0.00954039	0.000113084	0.000706773	0.000111034
												4.69541	148.891	4.19754	9.64749	0.00964749	0.000107097	0.000669358	0.000159464
												4.92603	156.204	7.31292	9.79518	0.00979518	0.000147686	0.00092304	0.00012622
												5.19936	164.871	8.6672	9.96885	0.00996885	0.000173671	0.00108545	0.000125236
												5.47269	173.538	8.66724	10.1409	0.0101409	0.000172092	0.00107558	0.000124097
												5.67982	180.106	6.56807	10.2742	0.0102742	0.000133214	0.000832586	0.000126763
												5.8357	185.049	4.9429	10.3773	0.0103773	0.000103117	0.000644483	0.000130386
												6.03645	191.415	6.3656	10.482	0.010482	0.000104696	0.000654351	0.000102795
												6.24359	197.983	6.56849	10.5998	0.0105998	0.00011782	0.000736376	0.000112107
												6.39901	202.911	4.92829	10.6869	0.0106869	8.70769e-05	0.00054423	0.00011043
												6.60024	209.292	6.38088	10.7835	0.0107835	9.66595e-05	0.000604122	9.46768e-05
												6.80741	215.862	6.56932	10.8711	0.0108711	8.76251e-05	0.000547657	8.33657e-05
												6.96189	220.76	4.89842	10.9493	0.0109493	7.81521e-05	0.00048845	9.97159e-05
												7.14698	226.629	5.86932	11.0342	0.0110342	8.4906e-05	0.000530662	9.04129e-05
												7.40326	234.756	8.12663	11.1561	0.0111561	0.000121921	0.000762005	9.37664e-05
												7.61967	241.618	6.86233	11.2648	0.0112648	0.000108676	0.000679226	9.89789e-05
												7.73643	245.321	3.7023	11.314	0.011314	4.92069e-05	0.000307543	8.3068e-05
												7.96707	252.634	7.31364	11.4356	0.0114356	0.00012157	0.000759812	0.00010389
												8.22335	260.761	8.12646	11.5635	0.0115635	0.000127885	0.000799283	9.83555e-05
												8.43977	267.623	6.86278	11.6556	0.0116556	9.20984e-05	0.000575615	8.38749e-05
												8.56507	271.597	3.9732	11.7085	0.0117085	5.29284e-05	0.000330802	8.32584e-05
												8.78717	278.639	7.04272	11.8271	0.0118271	0.000118638	0.000741486	0.000105284
												9.00359	285.502	6.86255	11.9276	0.0119276	0.000100519	0.000628243	9.15465e-05
												9.16308	290.56	5.0576	11.9661	0.0119661	3.84182e-05	0.000240114	4.74758e-05
												9.35099	296.518	5.9586	12.0892	0.0120892	0.000123149	0.00076968	0.000129171
												9.62435	305.186	8.6682	12.2266	0.0122266	0.000137358	0.000858489	9.90389e-05
												9.8367	311.92	6.73346	12.3287	0.0123287	0.000102173	0.00063858	9.48369e-05
												9.97582	316.331	4.41158	12.3957	0.0123957	6.69875e-05	0.000418672	9.4903e-05
												10.1882	323.065	6.73328	12.5044	0.0125044	0.000108714	0.000679461	0.000100911
												10.4615	331.733	8.66807	12.6465	0.0126465	0.000142095	0.000888092	0.000102456
												10.6495	337.692	5.95934	12.7429	0.0127429	9.63086e-05	0.000601929	0.000101006
												10.8089	342.749	5.05671	12.8134	0.0128134	7.05211e-05	0.000440757	8.71627e-05
												11.0168	349.34	6.59113	12.9292	0.0129292	0.000115781	0.00072363	0.000109788
												11.2816	357.737	8.39733	13.0618	0.0130618	0.000132622	0.000828886	9.87082e-05
												11.4939	364.471	6.73337	13.1673	0.0131673	0.000105556	0.000659725	9.79785e-05
												11.6557	369.601	5.1304	13.28	0.01328	0.000112638	0.000703989	0.000137219
												11.8454	375.615	6.01376	13.3681	0.0133681	8.80987e-05	0.000550617	9.15595e-05
												12.1187	384.282	8.66733	13.537	0.013537	0.000168935	0.00105584	0.000121819
												12.392	392.949	8.66716	13.7123	0.0137123	0.00017525	0.00109531	0.000126375
												12.6654	401.616	8.66716	13.8875	0.0138875	0.00017525	0.00109531	0.000126375
												12.9387	410.284	8.66724	14.0596	0.0140596	0.000172092	0.00107558	0.000124097
												13.151	417.016	6.73256	14.1945	0.0141945	0.000134877	0.000842982	0.00012521

## Sheet: 8. Sato 2011
Sato et al 2011												Total CO2 mass (Mt)	0.0104
												Cumulative time (yr)	Time step (yr)	Cumulative dissolved %	Cumulative mass dissolved (Mt)	Mass step (Mt)	Scaled mass step	Scaled rate (fraction CO2/yr)
												0	0	0	0	0	0	0
												0.1	0.1	22.5107	0.00234112	0.00234112	0.225107	2.25107
												11.4943	11.3943	27.8516	0.00289656	0.000555447	0.0534084	0.00468731
												50.1567	38.6625	33.9178	0.00352745	0.000630883	0.0606619	0.00156901
												102.403	52.2466	36.162	0.00376084	0.000233396	0.0224419	0.000429538
												150.47	48.0669	37.8284	0.00393415	0.000173304	0.0166639	0.000346681
												199.582	49.1118	39.2784	0.00408496	0.000150809	0.0145009	0.000295263
												248.694	49.1118	40.7285	0.00423577	0.000150809	0.0145009	0.000295263
												300.94	52.2466	42.0348	0.00437162	0.000135849	0.0130624	0.000250014
												346.917	45.977	43.0515	0.00447736	0.00010574	0.0101674	0.00022114
												391.85	44.9321	44.1402	0.00459058	0.000113228	0.0108873	0.000242307
												443.051	51.2017	45.3742	0.00471891	0.00012833	0.0123394	0.000240996
												497.388	54.3365	46.6807	0.00485479	0.00013588	0.0130654	0.000240454
												556.426	59.0387	48.2044	0.00501326	0.000158462	0.0152367	0.00025808
												597.701	41.2748	49.0761	0.00510392	9.06627e-05	0.00871757	0.000211208
												641.588	43.8871	50.3812	0.00523964	0.000135724	0.0130503	0.000297361
												695.925	54.3365	51.7599	0.00538303	0.000143384	0.0137869	0.000253732
												740.857	44.9321	52.8486	0.00549626	0.000113228	0.0108873	0.000242307
												796.238	55.3814	54.2275	0.00563965	0.0001434	0.0137884	0.000248972
												838.036	41.7973	55.2436	0.00574533	0.000105678	0.0101613	0.00024311
												897.597	59.5611	56.7673	0.0059038	0.00015847	0.0152375	0.000255829
												944.619	47.0219	57.9285	0.00602457	0.000120763	0.0116119	0.000246946
												1000	55.3814	59.0909	0.00614545	0.000120889	0.0116239	0.000209889

## Sheet: 9. Bonneville 2013
Bonneville et al 2013									Total CO2 mass (Mt)	33
									Cumulative time (yr)	Time step (yr)	Cumulative mass dissolved (Mt)	Mass step (Mt)	Scaled mass step	Scaled rate (fraction CO2/yr)
									0	0	0	0	0	0
									0.620098	0.620098	0.383959	0.383959	0.0116351	0.0187634
									3.5128	2.8927	0.866397	0.482438	0.0146193	0.00505387
									4.98966	1.47686	1.1556	0.2892	0.00876363	0.00593395
									6.46653	1.47686	1.40536	0.249764	0.00756859	0.00512477
									7.94339	1.47686	1.65841	0.25305	0.00766818	0.0051922
									9.42025	1.47686	1.89174	0.233332	0.00707066	0.00478762
									10.8971	1.47686	2.13493	0.243191	0.00736942	0.00498991
									12.374	1.47686	2.37155	0.236618	0.00717025	0.00485505
									13.8508	1.47686	2.58188	0.210327	0.00637355	0.0043156
									15.3277	1.47686	2.82507	0.243191	0.00736942	0.00498991
									16.8046	1.47686	3.04197	0.2169	0.00657272	0.00445046
									18.2814	1.47686	3.25558	0.213614	0.00647314	0.00438303
									19.7583	1.47686	3.47906	0.223473	0.0067719	0.00458532
									21.2352	1.47686	3.69267	0.213614	0.00647314	0.00438303
									22.712	1.47686	3.90957	0.2169	0.00657272	0.00445046
									24.1889	1.47686	4.12318	0.213614	0.00647314	0.00438303
									25.6658	1.47686	4.33351	0.210327	0.00637355	0.0043156
									27.1426	1.47686	4.54384	0.210327	0.00637355	0.0043156
									28.6195	1.47686	4.75745	0.213614	0.00647314	0.00438303
									30.0963	1.47686	4.95135	0.193895	0.00587562	0.00397844
									31.5732	1.47686	5.06637	0.115023	0.00348554	0.00236009
									33.0501	1.47686	5.1321	0.0657272	0.00199173	0.00134862
									34.5269	1.47686	5.2044	0.0723	0.00219091	0.00148349
									36.0038	1.47686	5.26355	0.0591545	0.00179256	0.00121376
									37.4807	1.47686	5.32599	0.0624409	0.00189215	0.00128119
									38.9575	1.47686	5.34242	0.0164318	0.000497934	0.000337156
									40.4344	1.47686	5.36214	0.0197182	0.00059752	0.000404587
									41.9113	1.47686	5.41472	0.0525818	0.00159339	0.0010789
									46.3419	4.43059	5.47716	0.0624409	0.00189215	0.000427064
									47.8187	1.47686	5.48702	0.00985909	0.00029876	0.000202294
									50.7724	2.95373	5.49688	0.00985909	0.00029876	0.000101147
									52.2493	1.47686	5.54289	0.0460091	0.00139421	0.000944037
									53.7262	1.47686	5.55932	0.0164318	0.000497934	0.000337156
									56.6799	2.95373	5.59219	0.0328636	0.000995867	0.000337156
									58.1568	1.47686	5.63162	0.0394363	0.00119504	0.000809175
									64.0642	5.90746	5.6612	0.0295773	0.000896281	0.00015172
									65.5411	1.47686	5.70392	0.0427227	0.00129463	0.000876606
									71.4485	5.90746	5.71707	0.0131454	0.000398347	6.74312e-05
									72.9254	1.47686	5.77622	0.0591545	0.00179256	0.00121376
									77.356	4.43059	5.7828	0.00657272	0.000199173	4.49541e-05
									78.8329	1.47686	5.81237	0.0295773	0.000896281	0.000606881
									80.3097	1.47686	5.84524	0.0328636	0.000995867	0.000674312
									81.7866	1.47686	5.84852	0.00328636	9.95867e-05	6.74312e-05
									83.2634	1.47686	5.8551	0.00657272	0.000199173	0.000134862
									84.7403	1.47686	5.89782	0.0427227	0.00129463	0.000876606
									86.2172	1.47686	5.92082	0.0230045	0.000697107	0.000472019
									92.1246	5.90746	5.96026	0.0394363	0.00119504	0.000202294
									93.6015	1.47686	5.99312	0.0328636	0.000995867	0.000674312
									99.4418	5.84033	5.99674	0.003615	0.000109545	1.87567e-05
									100	0.558178	6	0.00326232	9.88581e-05	0.000177109

[truncated: 2 more sheets: 10. Szulczewski 2013, 11. Kempka 2014]
